# Supplementary material for: Locally controlling dynamic exchange reactions in 3D printed thiol-acrylate vitrimers using dual-wavelength digital light processing
Source: Royal Society of Chemistry journal article supplement (doi:10.1039/d1py00427a), 2021-01-01
Supplement: d1py00427a1.pdf [file d1py00427a1.pdf]

## Supporting Information

### Locally controlling dynamic exchange reactions in 3D printed thiol-acrylate vitrimers using dual-wavelength digital light processing

Elisabeth Rossegger,<sup>a</sup> Khadijeh Moazzen,<sup>a</sup> Mathias Fleisch<sup>a</sup> and Sandra Schlögl<sup>\*a</sup>

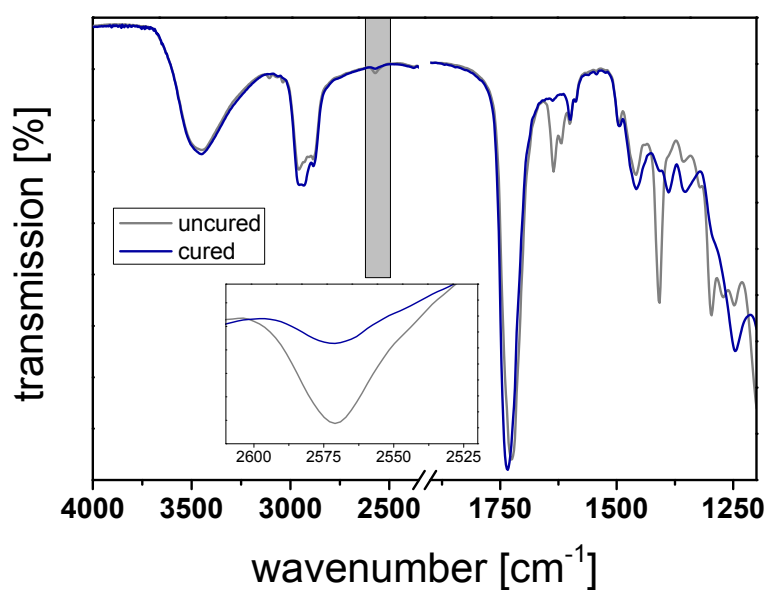

Figure S1 - FTIR spectra of resin-ER-1-lat prior to and after photocuring at 405 nm (3.6 mW cm<sup>-2</sup>).

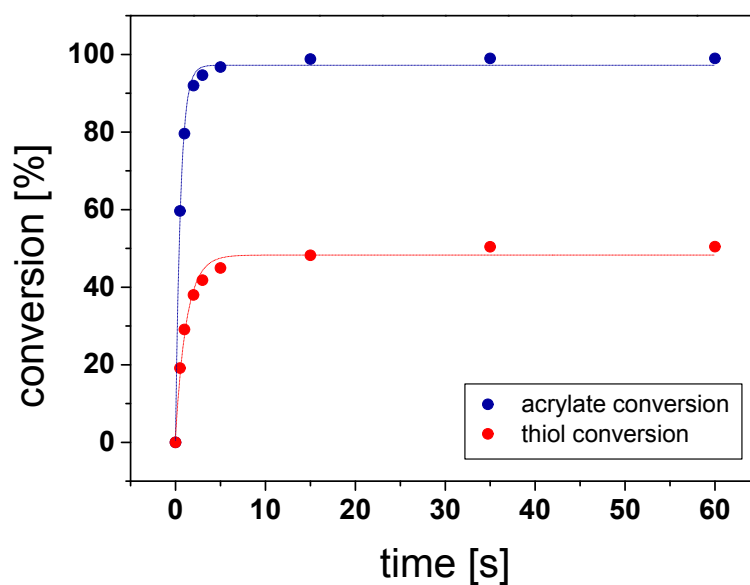

Figure S2 – Monitoring the conversion of acrylate and thiol groups in resin-ER-1-lat by FT-IR spectroscopy versus exposure time. Light exposure was carried out at 405 nm (3.6 mW cm<sup>-2</sup>). The lines are a guide for the eye.

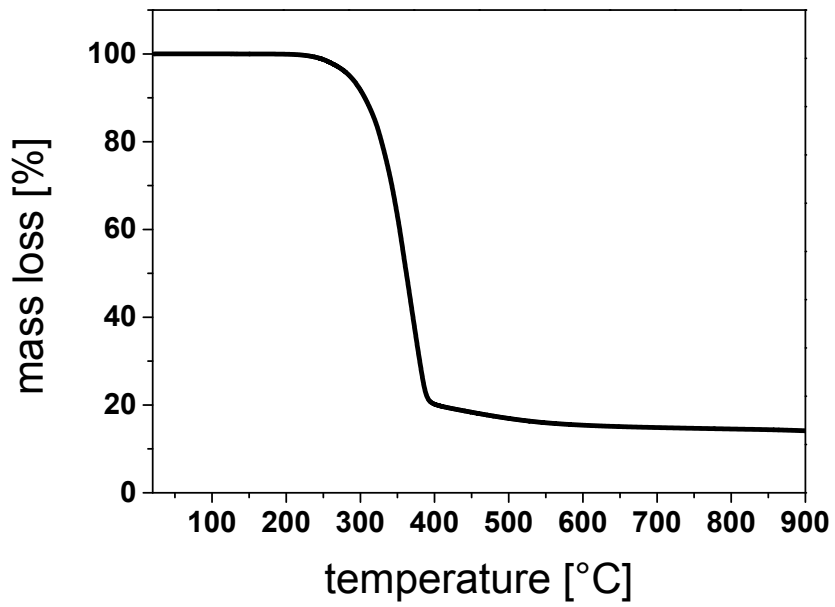

Figure S3 - TGA curve of cured resin-ER-1-lat.

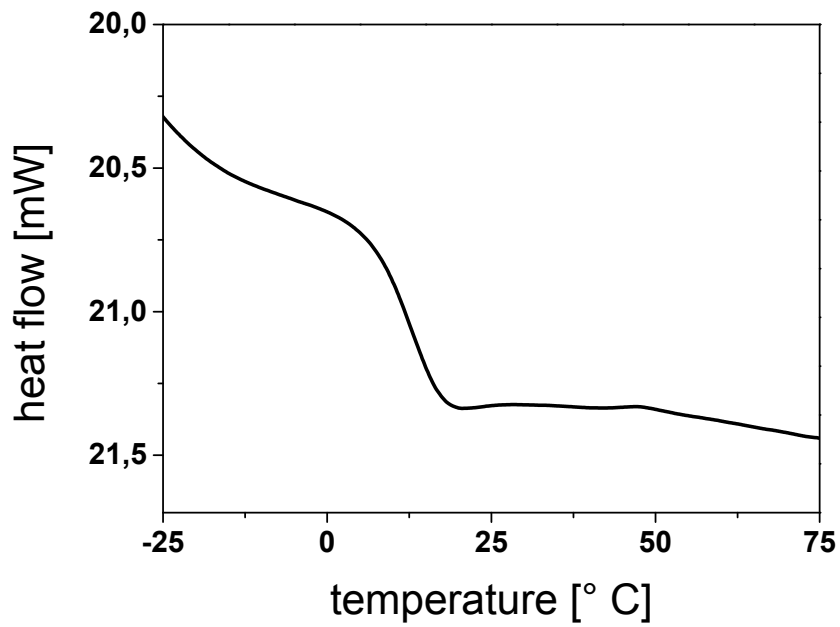

Figure S4 - DSC curve of cured resin-ER-1-lat.

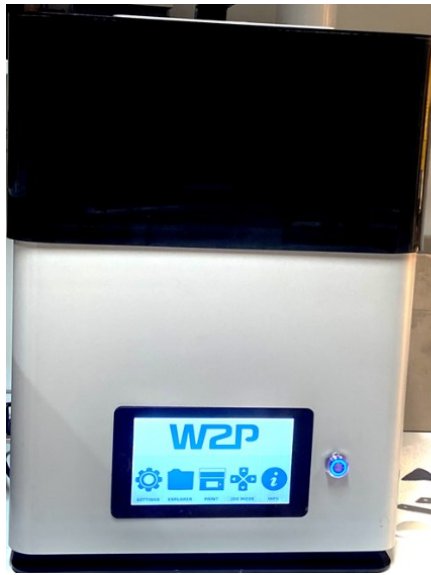

|                         |                        |
|-------------------------|------------------------|
| <b>Building area</b>    | 67.2 x 37.8 x 130.0 mm |
| <b>Intensity 405 nm</b> | 30 mW/cm <sup>2</sup>  |
| <b>Intensity 365 nm</b> | 8 mW/cm <sup>2</sup>   |
| <b>Max. filling</b>     | 400 ml                 |
| <b>Layer thickness</b>  | 25-200 μm              |
| <b>Max. heating</b>     | 80 °C                  |

**Figure S5** – Photograph of the dual-wavelength DLP 3D-printer prototype (with 405 and 365 nm light sources) from way2production and additional technical specifications of the prototype.
